# Supplementary material for: Climatic extremes and their social impact in 17th-century Transylvania. A climate-historical reconstruction in the context of the Little Ice Age
Source: Copernicus journal article supplement (doi:10.5194/egusphere-2025-3376), 2025-07-31
Supplement: Supplementary file 1 [file Climate-related natural disasters (Fig. 8 & 9).xlsx]

## Sheet: Sheet1
1	LMI		18 - 1618
1	IH		CY - cold year
2	EP		HY - hot year
2	IH		CSp - cold spring
3	EP		HW - harsh winter
3	IH		WW - warm winter
4	IH		CSm - cold summer
6	WH		WSm - warm summer
12	AH		CA - cold autumn
13	AH		WA - warm autumn
14	AH		DY - dry year
15	LMI		RY - rainy year
17	IH		DT - droughts
19	IH		FLSp - spring floods
21	EP		DSs - dry spring
22	EP		RSp - rainy spring
22	IH		DSm - dry summer
23	EP		FLSm - summer floods
25	IH		RSm - rainy summer
28	WH		DA - dry autumn
31	WH		RA - rainy autumn
32	WH		DW - dry winter
33	WH		FLW - winter floods
33	EP		HSW - heavy snowfall in winter
34	WH		LMI - locust/mouse invasions
34	EP		EP - epidemics
35	WH		IH - inflation and hunger
36	WH		WH - weak harvests
36	EP		AH - abundant harvests
37	WH
37	IH
38	IH
38	LMI
38	WH
43	WH
44	EP
45	EP
45	LMI
46	EP
47	EP
48	EP
48	IH
50	IH
51	IH
52	IH
54	EP
60	WH
60	EP
61	WH
61	EP
62	WH
62	EP
62	IH
63	WH
63	EP
64	EP
64	WH
65	WH
66	AH
70	WH
72	IH
73	AH
76	EP
76	IH
77	EP
78	EP
80	EP
84	LMI
85	IH
86	IH
90	LMI
90	IH
91	WH
92	WH
92	LMI
92	IH
93	LMI
94	LMI
99	LMI
1	CSp
5	HW
6	WW
7	CSm
7	WW
8	WSm
9	WW
10	CSp
10	HW
11	WSm
11	HW
13	HW
14	WW
15	HW
16	WW
17	WSm
17	HW
18	WSm
18	HW
19	WW
20	WSm
21	HW
22	HW
25	HW
27	WW
33	CY
34	CY
34	HW
35	HW
35	CY
36	HW
37	CY
37	WSm
41	CY
41	CSp
41	HW
41	CSm
42	WW
42	CSp
43	HW
45	HW
47	HW
48	HW
49	CSp
50	WW
51	WW
52	HW
53	HW
54	HW
55	HW
56	HW
57	HW
58	HW
59	HW
60	HW
61	HW
62	HW
63	HW
64	HW
65	HW
66	HW
68	HW
69	WSm
70	CA
73	WSm
74	HW
75	HW
76	WSm
77	HW
78	WSm
78	WA
80	WSm
80	HW
80	CA
81	HW
82	HW
82	CSp
82	CA
83	HW
84	HW
85	CSp
85	CA
86	HW
88	HW
89	HY
90	HW
90	WSm
91	WSm
93	CSp
94	HW
95	CSm
96	HW
97	HW
98	WSm
98	WW
99	HW
00	HW
3	DSm
6	RY
7	FLSp
7	DSm
9	DSm
11	DSm
13	HSW
13	FLW
13	FL
14	HSW
17	DSm
18	RSm
19	FL
21	FLSm
22	HSW
22	FL
25	DSm
26	HSW
27	RY
28	RSm
30	RY
31	DT
31	DY
32	DT
32	DY
33	DT
33	DY
34	DSs
35	DSm
36	RY
36	DSm
36	RA
36	FLSp
37	DSm
38	FL
38	RA
38	DSs
39	DSs
40	FLSm
40	RSm
41	RY
42	FL
43	HSW
43	RSp
43	FL
48	HSW
51	FLSm
53	DY
54	RY
55	HSW
58	RY
60	DSm
60	DW
61	DSm
61	DW
62	FLSp
62	DW
63	HSW
65	HSW
65	DSm
66	HSW
66	DSm
67	RY
67	RSm
67	FLSm
68	RSm
69	DSm
70	RSp
71	DT
71	RSm
72	DY
73	DW
74	DW
75	RY
75	RSm
75	RA
75	RSp
75	HSW
76	HSW
77	RSm
77	RA
78	RSp
78	DA
79	RY
82	DT
82	HSW
83	HSW
84	HSW
85	DT
86	DSm
87	RY
87	DSm
88	RSm
88	RA
89	DT
89	RA
90	HSW
90	DT
91	DSm
92	DT
93	RSp
93	RSm
94	FL
95	FL
96	FL
97	FL
98	FL
00	RSm
00	RA
1	HW
2	HW
3	HW
89	WW
95	HW
5	HSW
21	RY
22	RY
21	FL
41	RSp
41	RSm
94	HSW
95	HSW
1	EP
4	EP
5	EP
5	IH
6	EP
6	IH
35	EP
37	EP
41	EP
44	IH
45	IH
49	LMI
49	IH
59	EP
