# Supplementary material for: Climatic extremes and their social impact in 17th-century Transylvania. A climate-historical reconstruction in the context of the Little Ice Age
Source: Copernicus journal article supplement (doi:10.5194/egusphere-2025-3376), 2025-07-31
Supplement: Supplementary file 2 [file Discussion (Fig. 10,11,12).xlsx]

## Sheet: Sunsports - events (Fig. 10)
Year	Sunspots	Year	Spring	Summer	Autumn	Winter	Events	Warm
1595	43.95
1605	44.54									1 - Low temperatures
1615	40.91			-2		-4	-1			2 - Low temperatures - snow, frost
1625	34.85			-2		-2	-1			3 - High temperetures
1635	25.61					-1				4 - Heavy snowfall
1645	20.94		-1	-1		-1	-4			6 - Particularly harsh winter
1655	17.67					-2	-1			7 - Mild winter
1665	9.24			-1			-2
1675	5.87			-2			-2
1685	3.02			-3	-1		-3
1695	1.04	-1		-2			-3
1705	10.66			-1		-1	-1
Year	Sunspots	Year	Spring	Summer	Autumn	Winter	Events	Cold
1595	43.95
1605	44.54		1			4	5
1615	40.91		1	1		4	3
1625	34.85	1			1	4	4
1635	25.61	2					5
1645	20.94	2	2	1		4	18
1655	17.67		1			6	8
1665	9.24					10	11
1675	5.87				1	4	6
1685	3.02		1		3	7	9
1695	1.04		1	1		3	15
1705	10.66					4	4

## Sheet: δ¹⁸O - events (Fig. 11)
	year	δ¹⁸O	Events
1601	1601		2			1 - WW
1602	1602		2			2 - HW
1603	1603		2
1604	1604	-10.7
1605	1605		2
1606	1606		1
1607	1607		1
1608	1608	-10.8
1609	1609		1
1610	1610		2
1611	1611	-10.4	2
1612	1612
1613	1613		2
1614	1614	-10.9	1
1615	1615		2
1616	1616		1
1617	1617	-11.2	2
1618	1618
1619	1619	-12	1
1620	1620	-11.7
1621	1621		2
1622	1622	-11.8	2
1623	1623
1624	1624	-11.8
1625	1625	-11.8	2
1626	1626
1627	1627	-11.4	1
1628	1628	-11.4
1629	1629
1630	1630	-10.1
1631	1631
1632	1632	-9.7
1633	1633		2
1634	1634	-10
1635	1635
1636	1636	-10.7	2
1637	1637
1638	1638
1639	1639	-10.7
1640	1640
1641	1641	-10.2	2
1642	1642	-9.9	1
1643	1643
1644	1644	-9.8
1645	1645		2
1646	1646	-10.4
1647	1647	-10.6	2
1648	1648		2
1649	1649	-10.9	2
1650	1650		1
1651	1651	-10.7	1
1652	1652	-10.5	2
1653	1653		2
1654	1654	-10.4	2
1655	1655		2
1656	1656	-10.6	2
1657	1657	-10.9	2
1658	1658	-10.9	2
1659	1659		2
1660	1660	-10.9	2
1661	1661	-11.1	2
1662	1662		2
1663	1663	-11.5	2
1664	1664		2
1665	1665	-11.6	2
1666	1666	-11.3	2
1667	1667
1668	1668	-10.9	2
1669	1669	-10.9
1670	1670
1671	1671	-10.5
1672	1672
1673	1673
1674	1674	-9.6	2
1675	1675		2
1676	1676	-9
1677	1677		2
1678	1678	-9.4
1679	1679
1680	1680	-10.2	2
1681	1681	-10.4	2
1682	1682		2
1683	1683		2
1684	1684	-10.5	2
1685	1685
1686	1686	-10.6	2
1687	1687
1688	1688	-10.6	2
1689	1689		1
1690	1690	-10.7	2
1691	1691
1692	1692	-10.5
1693	1693
1694	1694		2
1695	1695	-10.4	2
1696	1696		2
1697	1697		2
1698	1698	-10.1	1
1699	1699		2
1700	1700	-9.7	2

## Sheet: OWDA - events (Fig. 12)
	MIN	MED	MAX	AP	FL	DT
1601	-4	1	4		1
1602	-3	1	5
1603	-3	1	3			1
1604	0	2	4
1605	-1	1	4	2	1
1606	-3	1	5
1607	-5	1	3		1	1
1608	-4	-2	0		3
1609	0	2	4		2	1
1610	-6	-3	-1
1611	-5	-3	1			1
1612	-2	0	1	1
1613	-2	1	3	1	1
1614	-2	0	2	3		1
1615	-4	1	2
1616	-6	-5	-2
1617	-6	-3	0			1
1618	-2	-1	2		1	1
1619	-5	-3	-2		1
1620	-2	0	2	1	2
1621	-5	-2	0	2	1
1622	-1	0	2
1623	-3	-2	2
1624	-5	-3	-2
1625	-3	-1	2			1
1626	-3	-1	0	1
1627	-4	-1	3	1
1628	0	3	4	1
1629	0	3	5
1630	0	3	6	1
1631	-5	-1	2			1
1632	-6	-2	0			1
1633	-2	-1	2			2
1634	-3	-1	0	1		2
1635	-3	1	2	1	3	1
1636	-4	-2	0			1
1637	-6	-3	-2			1
1638	-6	-3	1	1	1	1
1639	-2	2	5	2	2	3
1640	-3	1	2	2	1	1
1641	-1	1	3	2	1
1642	-1	1	3	2	2	1
1643	-5	-3	0	4	2
1644	-5	-3	-1	1
1645	-3	-1	1	1	1
1646	-2	1	2
1647	-5	-1	2		1
1648	-3	1	1	1
1649	-2	-1	1	4	2
1650	-2	0	2
1651	1	2	3	1	2
1652	-2	2	2
1653	-4	-2	0			5
1654	-2	-1	2	4	2
1655	-1	1	2	1
1656	-2	2	3
1657	-3	0	2		1
1658	-2	0	2	1	2
1659	-6	-4	1	1	3
1660	-6	-3	0			2
1661	-3	-1	2		2	2
1662	-4	-1	1	4	4	2
1663	-4	-1	3		1	2
1664	-4	-3	-1	1	1	1
1665	-4	-2	0	1		2
1666	-5	-2	1	1		1
1667	-1	1	2	3	1
1668	0	2	4	1	1
1669	-2	0	3			2
1670	-4	1	3	3	2
1671	-4	-2	1	3	2
1672	-5	-3	-1			1
1673	0	2	4	1		1
1674	-1	1	4		1	1
1675	-1	2	5	5	2
1676	-5	-3	0	1	1
1677	-3	-2	5	2
1678	-2	2	3	1		1
1679	-6	-4	1	1	1
1680	-2	0	2
1681	-3	2	4
1682	-2	-1	2	1	2
1683	-4	-3	0	1		1
1684	-5	-3	1	1	1	1
1685	-5	-3	0
1686	-6	-4	-2			1
1687	-6	-4	-2	1		1
1688	-1	2	5	2
1689	0	3	5	2	2
1690	-1	1	2	3	1	1
1691	1	2	3	1		2
1692	-1	1	2	1	1	2
1693	-2	1	3	3	1	1
1694	-4	-2	0	5	2	1
1695	-4	-2	1	4	2
1696	-1	2	5	2	2
1697	-2	0	1	1	3	2
1698	0	3	5	1	1
1699	0	3	6	1	1	1
1700	-5	-3	1	1		1
