# Supplementary material for: Climatic extremes and their social impact in 17th-century Transylvania. A climate-historical reconstruction in the context of the Little Ice Age
Source: Copernicus journal article supplement (doi:10.5194/egusphere-2025-3376), 2025-07-31
Supplement: Supplementary file 3 [file Episodic manifestations (Fig. 7).xlsx]

## Sheet: Thermal variability
	JAN	FEB	MAR	APR	MAY	JUN	JUL	AUG	SEP	OCT	NOV	DEC
1601	1	2	2	2	2	2	2	2	2	2	2	1		1	CWe
1602	2	1	2	2	2	2	2	2	2	2	2	2		2	ND
1603	1	2	2	2	2	2	2	2	2	2	2	2		3	Wwe
1604	2	2	2	2	2	2	2	2	2	2	2	2
1605	2	2	2	2	2	2	2	2	2	2	2	2
1606	2	2	2	2	2	1	2	2	2	2	2	2
1607	2	2	2	2	2	2	2	2	2	2	2	2
1608	2	2	2	1	2	2	2	2	2	2	2	2
1609	2	2	2	2	2	2	2	2	2	2	2	2
1610	2	2	2	2	2	2	2	2	2	2	3	2
1611	2	2	2	2	2	2	2	2	2	2	2	2
1612	2	2	2	2	2	2	2	2	2	2	2	2
1613	2	2	2	2	2	2	2	2	2	2	2	2
1614	2	2	2	2	2	2	2	2	2	2	2	2
1615	2	2	2	2	1	2	2	2	2	2	2	2
1616	2	2	2	2	1	2	2	2	2	2	2	2
1617	2	2	2	2	2	2	2	2	2	2	2	2
1618	2	2	2	2	2	2	2	2	2	2	2	2
1619	2	2	2	2	1	2	2	2	1	2	2	2
1620	2	2	3	2	2	2	2	2	2	2	2	2
1621	2	2	2	2	2	2	2	2	2	2	2	2
1622	2	1	2	2	2	2	2	2	2	2	2	2
1623	2	2	2	2	2	2	2	2	2	2	2	2
1624	2	2	2	2	2	2	2	2	2	2	2	2
1625	2	2	2	2	1	2	2	2	2	2	2	2
1626	2	2	2	2	2	2	2	2	2	2	2	2
1627	2	2	2	2	2	2	2	2	2	2	2	2
1628	2	2	2	2	1	2	2	2	2	2	2	2
1629	2	2	2	2	2	2	2	2	2	2	2	2
1630	2	2	2	2	2	2	2	2	2	2	2	2
1631	2	2	2	2	2	2	2	2	2	2	2	2
1632	2	2	2	1	2	2	2	2	2	2	2	2
1633	2	2	2	2	1	2	2	2	2	2	2	2
1634	2	2	2	2	2	2	2	2	2	2	1	2
1635	2	2	2	2	1	2	2	2	2	2	2	2
1636	2	2	2	2	2	2	2	2	2	2	2	2
1637	2	2	2	1	2	2	2	2	2	2	2	2
1638	2	2	2	2	1	2	2	2	2	2	1	2
1639	2	2	2	1	2	2	2	2	3	2	1	2
1640	3	1	1	3	2	2	2	2	3	2	2	2
1641	1	2	2	2	1	2	2	1	1	1	2	2
1642	2	2	1	2	1	2	2	2	2	2	2	2
1643	2	2	1	1	2	2	2	2	2	2	2	2
1644	1	2	2	2	2	2	2	2	2	2	2	2
1645	2	2	2	2	2	2	2	2	2	2	2	2
1646	2	2	1	2	2	2	2	2	2	2	2	2
1647	2	2	2	2	2	2	2	2	2	2	2	2
1648	2	2	2	2	2	2	2	2	2	2	2	2
1649	2	2	2	2	2	2	2	2	2	2	2	2
1650	2	2	2	1	2	2	2	2	2	3	3	2
1651	2	2	2	1	2	2	2	1	2	2	2	2
1652	2	2	2	2	2	2	2	2	2	2	2	2
1653	2	2	2	2	2	2	2	2	2	2	1	2
1654	2	2	1	2	2	2	2	2	1	2	2	2
1655	2	2	2	1	2	2	2	2	2	2	2	2
1656	2	2	2	2	2	2	2	2	2	2	2	2
1657	1	2	2	2	2	2	2	2	2	2	2	2
1658	1	2	2	2	2	2	2	2	2	1	2	2
1659	2	2	2	2	1	2	2	2	2	2	2	2
1660	2	2	2	1	2	2	2	2	2	2	2	2
1661	2	2	2	2	2	2	2	3	2	2	2	2
1662	2	2	2	2	1	2	2	2	2	1	2	2
1663	2	2	2	2	2	2	2	2	2	2	2	2
1664	2	2	2	2	1	2	2	2	1	1	2	2
1665	2	2	2	2	1	2	2	2	2	2	2	2
1666	2	2	2	2	2	2	2	2	2	2	2	2
1667	2	2	1	2	2	2	2	2	1	2	2	2
1668	2	3	3	1	2	2	2	2	2	1	2	2
1669	2	2	2	2	2	2	2	2	2	2	2	2
1670	2	2	2	2	2	2	2	2	2	2	2	2
1671	2	2	2	2	2	2	2	2	2	1	2	2
1672	2	2	2	2	2	2	2	2	2	2	1	2
1673	3	2	2	2	2	3	2	3	2	2	2	2
1674	2	2	2	2	2	2	2	2	2	2	2	2
1675	2	2	2	2	2	2	2	2	2	2	2	2
1676	2	2	2	2	2	2	2	2	2	2	1	3
1677	2	2	2	2	3	2	2	2	2	2	2	2
1678	2	2	2	2	2	2	2	2	2	2	2	2
1679	2	2	2	2	2	2	2	2	2	2	2	2
1680	1	2	2	2	2	2	2	2	2	2	2	2
1681	2	2	2	2	2	2	2	2	2	2	2	2
1682	2	2	1	2	2	2	2	2	2	2	2	2
1683	2	3	1	2	2	2	2	2	2	2	2	2
1684	2	2	2	2	2	1	2	2	2	2	2	2
1685	1	1	1	1	2	2	2	2	2	2	2	2
1686	2	2	2	1	2	2	2	2	2	2	2	2
1687	2	2	1	1	1	2	2	2	2	2	2	2
1688	2	2	2	2	2	2	2	2	2	2	2	2
1689	2	1	2	3	2	2	2	2	2	2	2	2
1690	1	2	1	2	2	2	2	2	2	2	2	2
1691	2	2	1	1	2	2	2	2	2	1	1	2
1692	1	3	1	2	2	2	2	2	2	1	1	2
1693	2	2	2	2	2	2	2	2	2	2	2	2
1694	1	1	1	2	2	2	2	2	2	2	2	2
1695	2	2	2	2	2	1	2	3	2	1	2	2
1696	3	3	2	2	2	2	2	2	2	2	2	2
1697	2	2	2	1	1	1	2	2	2	2	2	2
1698	2	2	1	2	2	2	2	2	2	2	2	2
1699	2	2	2	2	2	2	2	2	2	2	2	2
1700	2	2	1	1	2	2	2	2	2	2	2	2

## Sheet: Rainfall variability
	JAN	FEB	MAR	APR	MAY	JUN	JUL	AUG	SEP	OCT	NOV	DEC
1601	3	3	1	3	3	3	3	3	3	3	3	3
1602	3	3	3	3	3	3	3	3	3	3	3	3
1603	3	3	3	3	3	3	3	3	3	3	3	3		1	FL	4
1604	3	3	3	3	3	3	3	3	3	3	3	3		2	AP	1,2,3
1605	3	3	3	3	3	3	1	3	3	3	3	3		3	ND
1606	3	3	3	3	3	3	3	3	3	3	3	3		4	DT	5
1607	3	3	3	3	3	3	3	3	3	3	3	3		5	HS	6
1608	3	3	3	1	3	1	1	3	3	3	3	3
1609	3	3	3	3	1	3	3	3	1	3	3	3
1610	3	3	3	3	3	3	3	3	3	3	3	3
1611	3	3	3	3	3	3	3	3	3	3	3	3
1612	3	3	2	3	3	3	3	3	3	3	3	3
1613	3	3	3	3	3	3	3	3	3	3	3	3
1614	3	3	3	3	3	3	3	2	2	4	3	3
1615	3	3	3	3	2	2	3	3	3	3	3	3
1616	3	3	3	3	3	3	3	3	3	3	3	3
1617	3	3	3	3	3	3	3	3	3	3	3	3
1618	3	3	3	3	3	1	1	3	4	4	3	3
1619	3	3	3	3	3	3	3	3	5	3	3	3
1620	3	3	3	3	3	3	3	3	3	3	3	3
1621	3	3	3	3	3	3	3	3	3	3	3	3
1622	3	3	3	3	3	3	3	3	3	3	3	3
1623	3	3	3	3	3	3	3	3	3	3	3	3
1624	3	3	3	3	3	3	3	3	3	3	3	3
1625	3	3	3	3	3	3	3	3	3	3	3	3
1626	3	3	3	3	3	3	3	3	3	3	3	3
1627	3	3	3	3	3	3	3	3	3	3	3	3
1628	3	3	3	3	3	3	3	3	3	3	3	3
1629	3	3	3	3	3	3	3	3	3	3	3	3
1630	3	3	3	3	3	3	3	3	3	3	3	3
1631	3	3	3	3	3	3	3	3	3	3	3	3
1632	3	3	3	5	3	3	3	3	3	3	3	3
1633	3	3	3	5	3	3	3	3	4	4	3	3
1634	3	3	3	3	4	3	3	3	3	3	5	3
1635	3	3	3	3	1	1	1	3	3	3	1	3
1636	3	3	3	3	3	3	3	3	3	2	1	1
1637	3	3	3	5	3	3	3	3	3	3	3	3
1638	1	3	3	3	3	3	3	3	3	3	5	3
1639	3	3	3	5	2	1	3	3	4	4	5	3
1640	3	3	5	4	4	3	3	3	3	3	3	3
1641	3	3	3	3	3	3	1	3	3	3	2	3
1642	4	4	4	3	5	3	1	3	3	4	3	3
1643	3	3	3	3	1	3	2	3	3	3	5	3
1644	3	3	3	3	3	3	3	2	3	3	3	3
1645	3	3	3	3	3	1	3	3	2	3	3	3
1646	3	3	5	3	3	3	3	3	3	3	3	3
1647	3	3	3	3	3	3	1	3	3	3	3	3
1648	3	3	3	3	3	3	3	3	3	3	3	3
1649	3	3	3	3	3	3	2	3	2	1	2	3
1650	3	3	3	5	3	3	3	3	3	3	3	3
1651	1	3	3	5	3	3	3	3	3	3	3	3
1652	3	3	3	3	3	3	3	3	3	3	3	3
1653	3	3	3	3	3	3	3	3	3	3	5	3
1654	2	4	5	3	3	3	1	1	5	3	3	3
1655	3	3	3	5	3	3	3	3	3	3	3	3
1656	3	3	3	3	3	3	3	3	3	3	3	3
1657	3	3	3	3	3	3	3	3	3	3	3	3
1658	3	3	3	3	3	1	3	3	3	1	3	3
1659	3	3	3	1	3	3	1	3	3	3	3	3
1660	3	3	3	3	3	3	3	3	3	3	3	3
1661	3	3	3	1	1	3	3	3	3	3	3	3
1662	3	3	3	3	3	1	1	4	3	5	3	1
1663	3	3	3	3	3	3	3	4	3	3	3	3
1664	3	3	3	3	3	3	3	3	5	3	5	3
1665	3	3	3	3	5	4	3	3	3	3	3	3
1666	3	3	3	3	3	3	3	3	3	3	3	3
1667	3	3	3	3	3	3	1	3	5	3	3	3
1668	1	3	3	2	5	1	1	1	3	5	3	3
1669	3	3	3	3	3	3	3	4	4	4	5	3
1670	3	3	1	1	3	1	1	1	3	3	3	3
1671	3	3	3	3	3	3	2	2	3	3	5	3
1672	3	3	3	3	3	3	3	3	3	3	3	3
1673	3	3	3	3	3	3	3	3	2	3	3	3
1674	3	3	3	3	3	3	1	3	3	3	3	3
1675	3	3	2	2	3	1	3	1	3	3	3	3
1676	3	3	3	3	3	1	3	3	3	3	3	3
1677	3	3	2	2	3	3	3	3	3	2	2	2
1678	3	3	3	3	3	3	3	3	3	3	3	3
1679	3	3	3	3	3	3	1	3	3	3	3	3
1680	3	3	3	3	3	3	3	3	3	3	3	3
1681	3	3	3	3	3	3	3	3	3	3	3	3
1682	3	3	5	3	1	3	3	3	3	3	3	3
1683	3	3	3	3	3	3	3	4	3	3	3	3
1684	3	3	1	4	3	3	3	3	3	3	3	3
1685	3	3	3	3	3	3	3	3	3	3	3	3
1686	3	3	3	5	3	3	3	3	3	3	3	3
1687	3	3	3	3	3	3	3	3	3	3	3	3
1688	3	3	3	3	3	3	3	3	3	3	3	3
1689	3	3	1	3	3	2	1	3	3	3	2	3
1690	5	5	1	3	3	4	3	2	3	3	2	5
1691	3	2	2	3	3	3	3	4	3	3	3	3
1692	3	2	1	3	3	3	3	3	4	3	3	3
1693	3	3	3	3	1	3	3	3	4	3	2	3
1694	5	3	3	3	3	1	1	4	3	2	2	3
1695	3	3	3	1	3	3	3	3	2	3	3	3
1696	3	3	3	3	3	3	2	1	3	3	3	3
1697	3	3	3	3	4	4	1	3	4	3	3	3
1698	3	3	3	3	3	3	1	1	3	3	3	3
1699	3	3	3	3	3	3	1	3	4	4	3	3
1700	3	3	3	3	4	3	3	3	3	3	3	3

## Sheet: Climate-related natural disaste
	JAN	FEB	MAR	APR	MAY	JUN	JUL	AUG	SEP	OCT	NOV	DEC
1601	5	5	5	5	5	5	2	5	5	5	5	5
1602	5	5	5	5	5	5	2	1	5	5	5	5		1	SW	1
1603	5	5	5	3	3	1	5	5	5	5	5	5		2	HL	2
1604	5	5	5	5	5	5	5	5	5	5	5	5		3	LMI	3
1605	5	5	5	5	2	5	5	5	5	5	5	5		4	EP	4
1606	5	5	5	5	5	5	5	5	5	5	5	1		5	ND
1607	1	5	5	5	5	5	5	5	5	5	5	9		7	WH	7
1608	5	5	5	5	5	9	2	2	5	5	5	5		8	SS	8
1609	5	5	5	5	5	5	5	3	5	5	5	5
1610	5	5	5	5	5	5	3	3	5	5	5	5
1611	5	5	5	5	5	5	1	3	5	5	5	5
1612	5	5	5	5	5	5	1	5	5	1	5	5
1613	5	5	5	5	5	5	5	1	3	5	5	5
1614	5	5	5	5	5	2	5	5	2	2	5	5
1615	5	5	5	5	2	5	5	5	5	5	5	9
1616	5	5	5	5	3	5	5	5	5	5	5	5
1617	5	5	5	5	5	5	5	5	5	5	5	5
1618	5	5	5	5	5	5	5	5	3	5	5	5
1619	5	5	5	5	5	5	5	3	5	5	5	5
1620	5	5	5	5	5	5	5	5	5	5	5	5
1621	5	5	5	5	5	5	5	5	5	5	5	5
1622	5	5	5	5	5	5	5	4	4	4	4	4
1623	5	5	5	5	5	5	5	5	5	5	5	5
1624	5	5	5	5	5	5	5	5	5	5	5	5
1625	5	5	5	5	5	5	5	5	5	5	5	5
1626	5	5	5	5	5	5	5	5	5	5	5	5
1627	5	5	5	5	5	5	5	5	5	5	5	5
1628	5	5	5	5	5	5	5	5	5	5	5	5
1629	5	5	5	5	5	5	5	5	5	5	5	5
1630	5	5	5	5	5	5	5	5	5	5	5	5
1631	5	5	5	5	5	5	5	5	5	5	5	5
1632	5	5	5	5	5	5	5	5	5	5	5	5
1633	5	5	5	5	5	5	5	5	5	5	5	5
1634	5	5	5	5	2	5	1	5	5	5	5	5
1635	5	5	5	5	7	5	5	5	5	4	5	5
1636	9	9	5	5	5	5	5	2	5	5	5	5
1637	5	5	5	5	5	5	3	5	5	5	5	5
1638	5	5	5	5	5	2	5	5	5	5	5	5
1639	5	5	5	5	2	5	5	5	5	5	5	5
1640	5	5	1	5	2	5	5	5	5	5	5	5
1641	5	5	5	5	5	5	2	5	5	5	5	5
1642	5	5	5	5	5	5	5	5	5	5	5	5
1643	5	5	5	5	2	5	2	5	5	5	5	5
1644	5	5	5	5	5	5	5	5	5	5	5	5
1645	5	5	5	5	5	5	2	5	5	5	5	5
1646	5	5	5	5	5	5	5	5	5	5	5	5
1647	5	5	5	5	5	5	5	5	5	5	5	5
1648	5	5	5	5	5	5	5	5	5	5	5	5
1649	5	5	5	5	5	5	7	7	3	5	5	5
1650	5	5	9	5	5	5	5	5	5	5	5	5
1651	5	5	5	5	5	5	5	5	5	5	5	5
1652	5	9	5	5	5	2	2	2	5	9	5	5
1653	5	5	5	5	5	5	5	5	5	5	5	5
1654	5	5	5	5	5	5	5	5	5	5	5	5
1655	5	5	5	5	5	5	5	5	9	5	5	5
1656	5	5	5	5	5	5	5	5	5	5	5	5
1657	5	5	5	5	5	5	5	5	5	5	5	5
1658	5	5	5	2	5	5	5	5	5	5	5	5
1659	5	5	5	5	5	5	2	5	5	5	5	5
1660	5	5	5	5	5	5	5	5	5	5	5	5
1661	5	1	5	5	5	5	5	5	5	5	5	5
1662	5	5	5	4	5	5	5	4	5	5	5	5
1663	5	5	5	5	5	5	5	5	5	5	5	5
1664	5	5	5	5	5	5	5	5	5	5	5	5
1665	5	5	5	5	5	5	5	5	5	5	5	5
1666	5	5	5	5	5	5	5	5	5	5	5	5
1667	5	5	5	5	5	5	5	5	5	5	5	5
1668	5	5	5	5	5	5	5	5	5	5	5	5
1669	5	5	5	5	5	5	5	5	5	5	5	5
1670	5	5	5	5	5	5	5	5	5	5	5	5
1671	5	5	5	9	5	5	9	5	5	5	5	5
1672	5	5	5	5	9	5	5	5	5	5	5	5
1673	5	5	5	5	5	5	5	5	2	5	5	5
1674	5	5	5	5	5	5	5	5	5	5	5	5
1675	5	5	5	5	5	5	5	5	5	5	5	4
1676	5	5	5	5	5	5	5	5	5	5	5	5
1677	5	5	5	5	5	5	2	9	5	5	5	5
1678	5	5	5	5	5	5	5	5	5	5	5	5
1679	5	5	5	5	5	5	5	5	5	5	5	5
1680	5	5	5	5	5	5	5	5	4	5	5	5
1681	5	5	5	5	5	5	2	2	5	5	5	5
1682	5	5	5	5	2	5	5	5	5	5	5	5
1683	5	5	5	5	5	1	5	5	5	5	5	5
1684	5	5	5	5	5	5	5	5	5	5	5	5
1685	5	5	5	5	2	5	5	5	5	5	5	5
1686	5	5	5	5	5	5	9	5	5	5	5	5
1687	5	5	5	5	5	5	5	5	5	5	5	5
1688	5	5	5	5	5	9	5	5	5	5	5	5
1689	5	5	5	5	5	5	2	5	5	5	5	5
1690	5	5	5	5	5	5	2	3	3	5	5	5
1691	5	5	5	5	9	2	5	3	5	5	5	5
1692	5	5	5	5	5	2	5	3	5	5	5	5
1693	1	5	5	5	5	2	1	5	5	1	5	5
1694	5	5	5	5	5	5	5	5	5	5	5	5
1695	5	5	5	5	5	5	5	5	5	5	5	5
1696	5	5	5	5	5	5	5	2	5	5	5	5
1697	5	5	5	5	9	9	2	2	5	5	5	5
1698	5	5	5	5	5	5	5	5	9	5	9	5
1699	5	5	5	5	5	5	2	5	5	5	5	5
1700	5	5	5	5	5	5	5	5	5	5	5	5
