# Supplementary material for: Climatic extremes and their social impact in 17th-century Transylvania. A climate-historical reconstruction in the context of the Little Ice Age
Source: Copernicus journal article supplement (doi:10.5194/egusphere-2025-3376), 2025-07-31
Supplement: Supplementary file 4 [file Rainfall variability (Fig. 5 & 6).xlsx]

## Sheet: Sheet1
1	CSp		18 - 1618
1	HW		CY - cold year
2	HW		HY - hot year
3	DSm		CSp - cold spring
3	HW		HW - harsh winter
5	HW		WW - warm winter
5	HSW		CSm - cold summer
6	WW		WSm - warm summer
6	RY		CA - cold autumn
7	CSm		WA - warm autumn
7	WW		DY - dry year
7	FLSp		RY - rainy year
8	WSm		DT - droughts
9	WW		FLSp - spring floods
9	DSm		DSs - dry spring
10	CSp		RSp - rainy spring
10	HW		DSm - dry summer
11	WSm		FLSm - summer floods
11	HW		RSm - rainy summer
11	DSm		DA - dry autumn
13	HW		RA - rainy autumn
13	FLW		DW - dry winter
14	WW		FLW - winter floods
14	HSW		HSW - heavy snowfall in winter
15	HW
16	WW
17	WSm
17	HW
17	DSm
18	WSm
18	HW
18	RSm
19	WW
19	FL
20	WSm
21	HW
21	FLSm
21	RY
21	FL
22	HW
22	HSW
22	RY
25	HW
25	DSm
26	HSW
27	WW
27	RY
28	RSm
30	RY
31	DY
32	DY
33	CY
33	DY
34	CY
34	HW
34	DSs
35	HW
35	CY
35	DSm
36	HW
36	RA
37	CY
37	WSm
37	DSm
38	DSs
39	DSs
40	RSm
41	CY
41	CSp
41	HW
41	CSm
41	RY
41	RSp
41	RSm
42	WW
42	CSp
42	FL
43	HW
43	RSp
45	HW
47	HW
48	HW
48	HSW
49	CSp
50	WW
51	WW
51	FLSm
52	HW
53	HW
53	DY
54	HW
54	RY
55	HW
55	HSW
56	HW
57	HW
58	HW
58	RY
59	HW
60	HW
60	DW
61	HW
61	DW
62	HW
63	HW
63	HSW
64	HW
65	HW
65	DSm
66	HW
66	DSm
67	FLSm
68	HW
68	RSm
69	WSm
69	DSm
70	CA
70	RSp
71	RSm
72	DY
73	WSm
73	DW
74	HW
74	DW
75	HW
75	RSp
76	WSm
76	HSW
77	HW
77	RA
78	WSm
78	WA
78	DA
79	RY
80	WSm
80	HW
80	CA
81	HW
82	HW
82	CSp
82	CA
83	HW
83	HSW
84	HW
84	HSW
85	CSp
85	CA
85	DT
86	HW
86	DSm
87	RY
88	HW
88	RA
89	HY
89	RA
89	WW
90	HW
90	WSm
90	DT
91	WSm
91	DSm
92	DT
93	CSp
93	RSm
94	HW
94	FL
94	HSW
95	CSm
95	FL
95	HW
95	HSW
96	HW
96	FL
97	HW
97	FL
98	WSm
98	WW
98	FL
99	HW
00	HW
00	RSm
00	RA
13	HSW
13	FL
22	FL
31	DT
32	DT
33	DT
36	RY
36	DSm
36	FLSp
38	FL
38	RA
40	FLSm
43	HSW
43	FL
60	DSm
61	DSm
62	FLSp
62	DW
65	HSW
66	HSW
67	RY
67	RSm
7	DSm
71	DT
75	RY
75	RSm
75	RA
75	HSW
77	RSm
78	RSp
82	DT
82	HSW
87	DSm
88	RSm
89	DT
90	HSW
93	RSp
