# Supplementary material for: Climatic extremes and their social impact in 17th-century Transylvania. A climate-historical reconstruction in the context of the Little Ice Age
Source: Copernicus journal article supplement (doi:10.5194/egusphere-2025-3376), 2025-07-31
Supplement: Supplementary file 5 [file Thermal variability (Fig. 3 & 4).xlsx]

## Sheet: Sheet1
1	CSp		18 - 1618
1	HW		CY - cold year
2	HW		HY - hot year
3	HW		CSp - cold spring
5	HW		HW - harsh winter
6	WW		WW - warm winter
7	CSm		CSm - cold summer
7	WW		WSm - warm summer
8	WSm		CA - cold autumn
9	WW		WA - warm autumn
10	CSp
10	HW
11	WSm
11	HW
13	HW
14	WW
15	HW
16	WW
17	WSm
17	HW
18	WSm
18	HW
19	WW
20	WSm
21	HW
22	HW
25	HW
27	WW
33	CY
34	CY
34	HW
35	HW
35	CY
36	HW
37	CY
37	WSm
41	CY
41	CSp
41	HW
41	CSm
42	WW
42	CSp
43	HW
45	HW
47	HW
48	HW
49	CSp
50	WW
51	WW
52	HW
53	HW
54	HW
55	HW
56	HW
57	HW
58	HW
59	HW
60	HW
61	HW
62	HW
63	HW
64	HW
65	HW
66	HW
68	HW
69	WSm
70	CA
73	WSm
74	HW
75	HW
76	WSm
77	HW
78	WSm
78	WA
80	WSm
80	HW
80	CA
81	HW
82	HW
82	CSp
82	CA
83	HW
84	HW
85	CSp
85	CA
86	HW
88	HW
89	WW
89	HY
90	HW
90	WSm
91	WSm
93	CSp
94	HW
95	HW
95	CSm
96	HW
97	HW
98	WSm
98	WW
99	HW
00	HW
